# Supplementary material for: Unique synthesis of mesoporous peapod-like NiCo2O4–C nanorods array as an enhanced anode for lithium ion batteries
Source: Royal Society of Chemistry journal article supplement (doi:10.1039/c5ta06877k), 2015-01-01
Supplement: c5ta06877k1.pdf [file c5ta06877k1.pdf]

## Supporting information

# Unique Synthesis of Mesoporous Peapod-like NiCo<sub>2</sub>O<sub>4</sub>-C Nanorods Array as Enhanced Anode for Lithium Ion Batteries

Liang Peng, Huijuan Zhang, Yuanjuan Bai, Jiao Yang, Yu Wang\*

*The State Key Laboratory of Mechanical Transmissions and School of Chemistry and Chemical Engineering, Chongqing University, Chongqing 400044, China*

E-mail: wangy@cqu.edu.cn; prospectwy@gmail.com

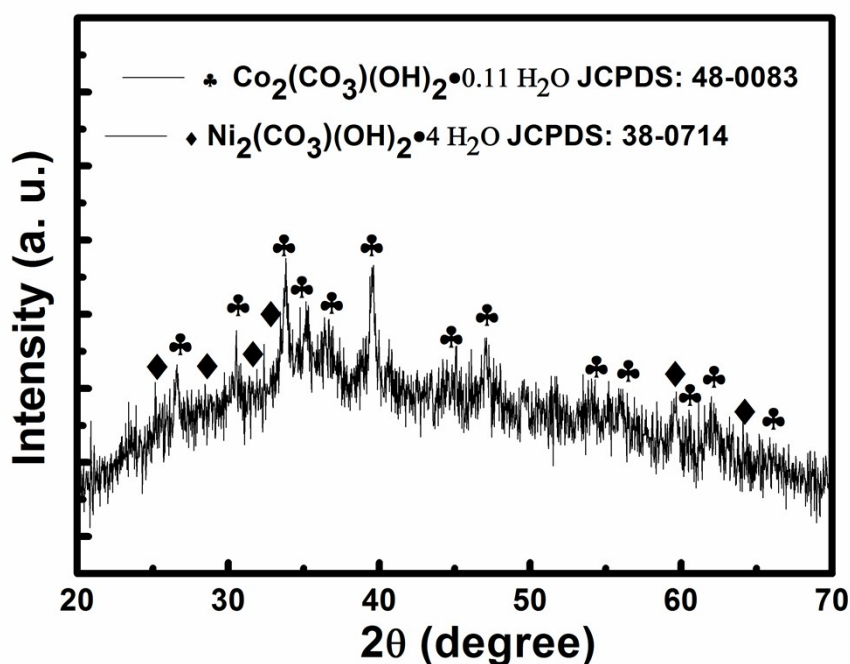

**Fig. S1** XRD pattern of the Ni-Co precursors, where the  $\text{Co}_2(\text{CO}_3)(\text{OH})_2 \cdot 0.11 \text{H}_2\text{O}$  and  $\text{Ni}_2(\text{CO}_3)(\text{OH})_2 \cdot 4 \text{H}_2\text{O}$  are shown. The samples are scraped off by a thin knife from the substrate to better reflect the XRD peaks of the Ni-Co precursors.

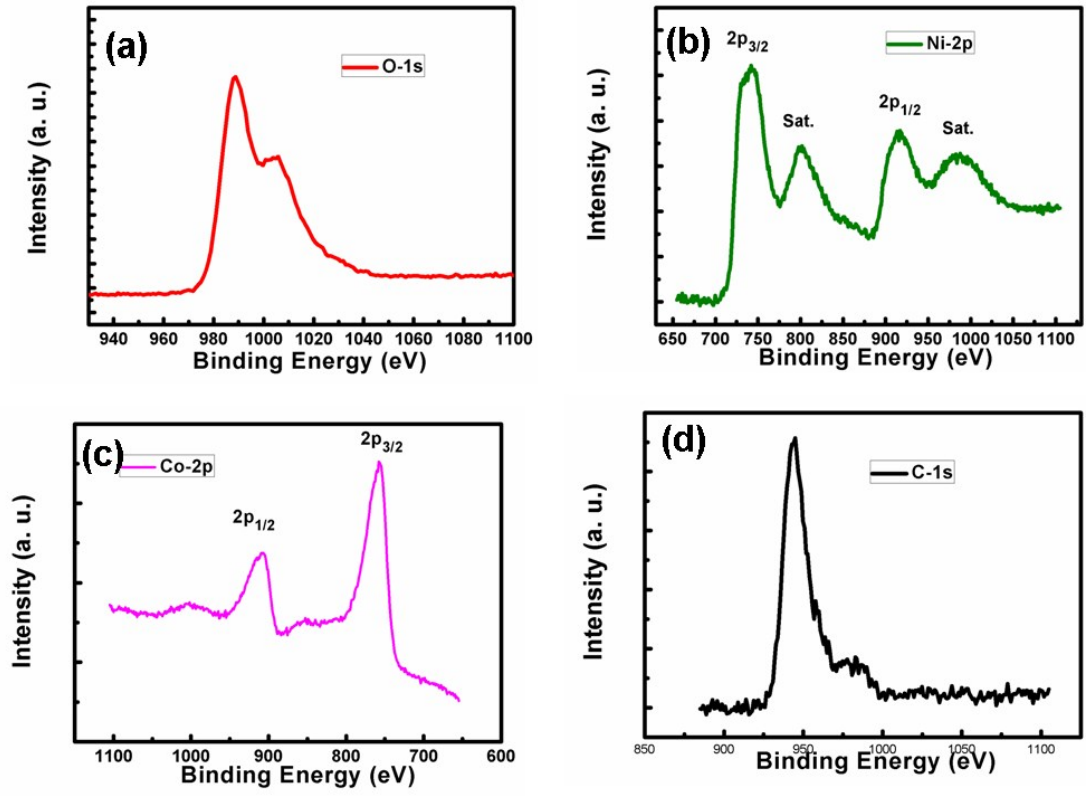

**Fig. S2** XPS analysis of the peapod-like NCO-C nanorods array: (a) O 1s (b) Ni 2p (c) Co 2p and (d) C 1s.

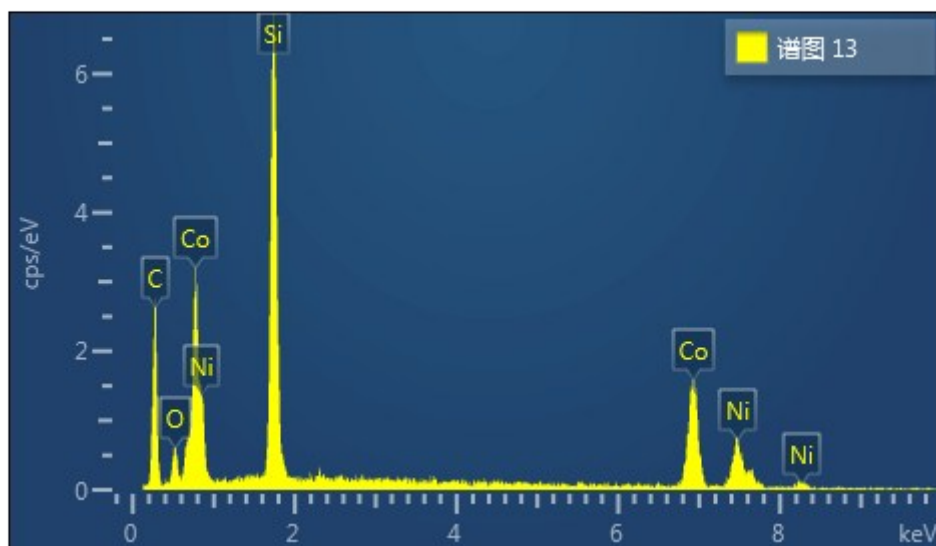

**Fig. S3** EDS spectrum of the peapod-like NCO-C nanorods array scraped from the Ni-foam, the peak of Si come from the Si wafer. .

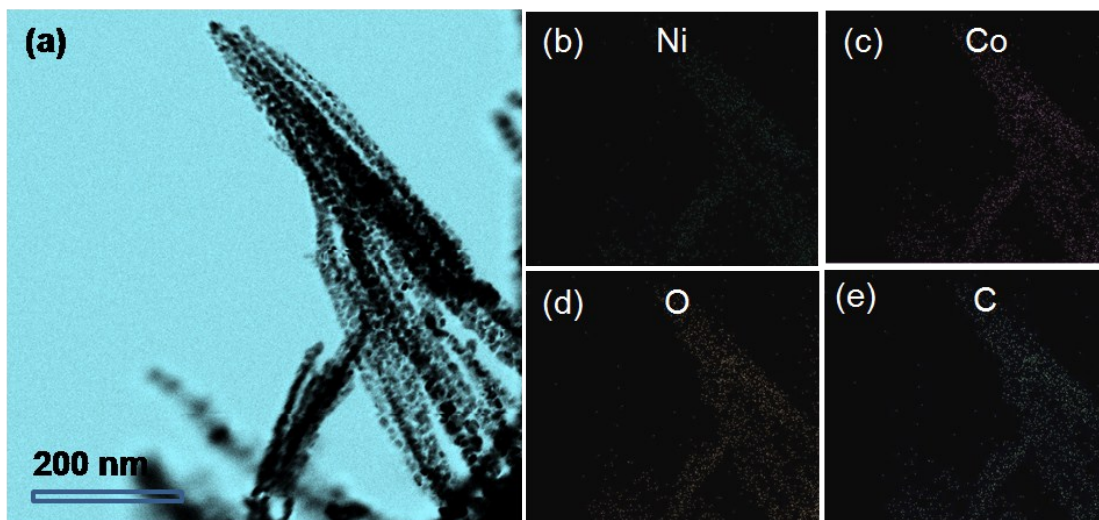

**Fig. S4** Elemental mapping of the peapod-like NCO-C nanorods array: (a) is the typical TEM image of the array. (b)-(e) are the corresponding elemental distribution images.

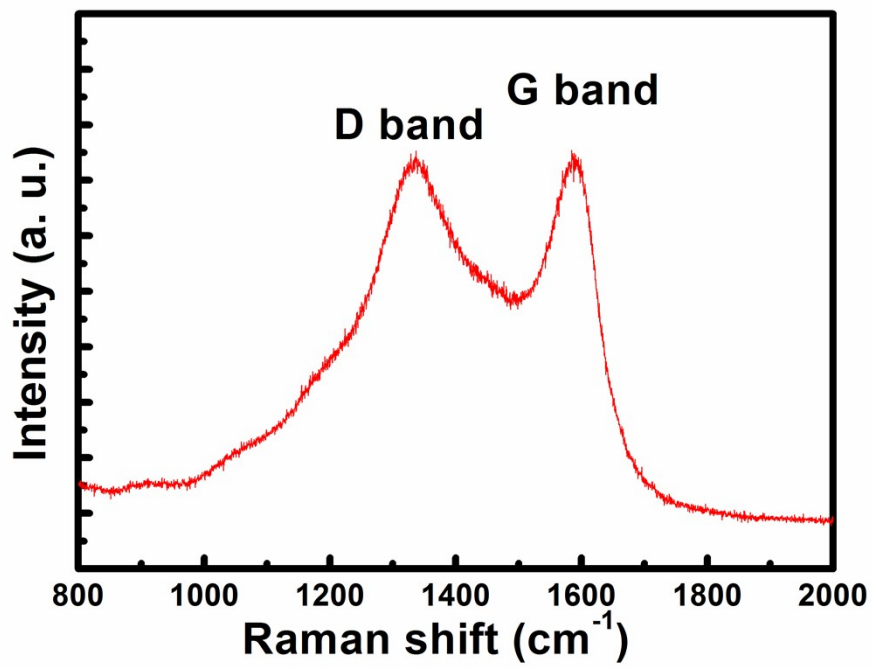

**Fig. S5** Raman spectra of the peapod-like NCO-C nanorods array.

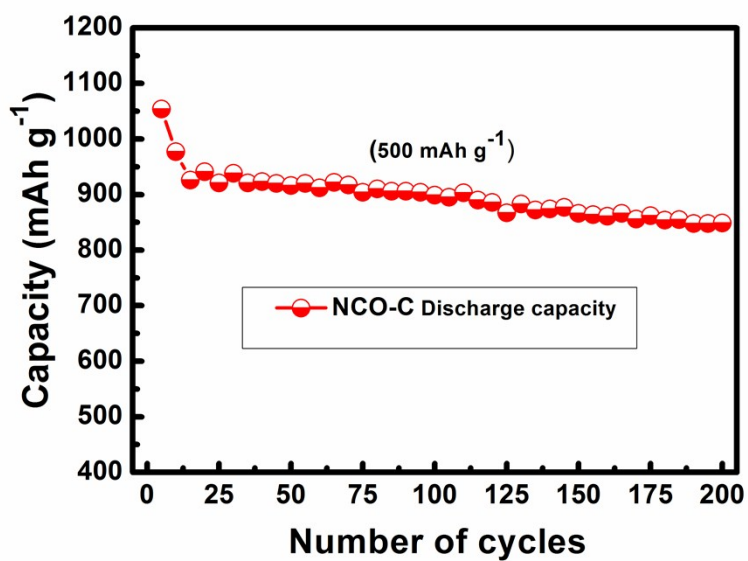

**Fig. S6** The cycle performance of the NCO-C composite, which is scripted off from the Ni-sheet.
